# Supplementary material
Source: publisher site journal article supplement (http://www.kjim.org/upload/media/kjim-2020-380-suppl2.pdf)
Supplement: Supplementary file 1 [file kjim-2020-380-suppl2.pdf]

**Supplementary Table 2. Baseline characteristics of subjects according to coronavirus disease 2019 infection before matching (n = 62,909)**

| Characteristic              | Control (n = 61,265) | Case (n = 1,644) | p value  |
|-----------------------------|----------------------|------------------|----------|
| Male sex                    | 32,265 (52.7)        | 714 (43.4)       | < 0.0001 |
| Age, yr                     | 67.8 ± 14.8          | 65.5 ± 13.7      | < 0.0001 |
| Age over 65 yr              | 37,502 (61.2)        | 850 (51.7)       | < 0.0001 |
| Region of diagnosis         |                      |                  |          |
| Daegu & Gyeongbuk           | 8,962 (14.6)         | 1,098 (66.8)     | < 0.0001 |
| Tested hospital             |                      |                  |          |
| 3rd                         | 21,810 (35.6)        | 323 (19.7)       | < 0.0001 |
| Comorbidities               |                      |                  |          |
| Diabetes                    | 22,206 (36.3)        | 512 (31.1)       | < 0.0001 |
| Dyslipidemia                | 37,885 (61.8)        | 917 (55.8)       | < 0.0001 |
| MI & Stroke                 | 23,609 (38.5)        | 456 (27.7)       | < 0.0001 |
| Heart failure               | 19,197 (31.3)        | 339 (20.6)       | < 0.0001 |
| Liver disease               | 39,165 (63.9)        | 962 (58.5)       | < 0.0001 |
| Cancer                      | 14,299 (23.3)        | 172 (10.5)       | < 0.0001 |
| COPD                        | 23,504 (38.4)        | 459 (27.9)       | < 0.0001 |
| Asthma                      | 24,261 (39.6)        | 466 (28.4)       | < 0.0001 |
| ESRD with dialysis          | 3,840 (6.3)          | 18 (1.1)         | < 0.0001 |
| Immunocompromised status    | 7,696 (12.6)         | 185 (11.3)       | 0.1137   |
| Charlson comorbidity index  |                      |                  |          |
| 0                           | 3,312 (5.4)          | 196 (11.9)       | < 0.0001 |
| 1                           | 6,417 (10.5)         | 278 (16.9)       |          |
| ≥ 2                         | 51,536 (84.1)        | 1,170 (71.2)     |          |
| Exposure to RAAS inhibitors |                      |                  |          |
| RAAS inhibitors             | 45,168 (73.7)        | 1,217 (74.0)     | 0.7842   |
| ACE inhibitors              | 3,589 (5.9)          | 85 (5.2)         | 0.2405   |
| ARBs                        | 43,240 (70.6)        | 1,172 (71.3)     | 0.5324   |
| Death                       | 2,583 (4.2)          | 165 (10.0)       | < 0.0001 |

Values are presented as number (%) or mean ± SD.

MI, myocardial infarction; COPD, chronic obstructive pulmonary disease; ESRD, end-stage renal disease; RAAS, renin-angiotensin-aldosterone system; ACE, angiotensin-converting enzyme; ARB, angiotensin receptor blocker.
